# Supplementary material for: Four New Species and a New Combination of Boletaceae (Boletales) from Subtropical and Tropical China
Source: MDPI journal article supplement (doi:10.3390/jof10050348), 2024-05-13
Supplement: s1 [file s1]

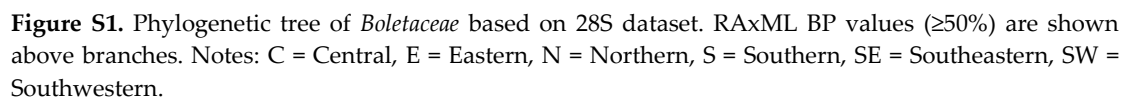

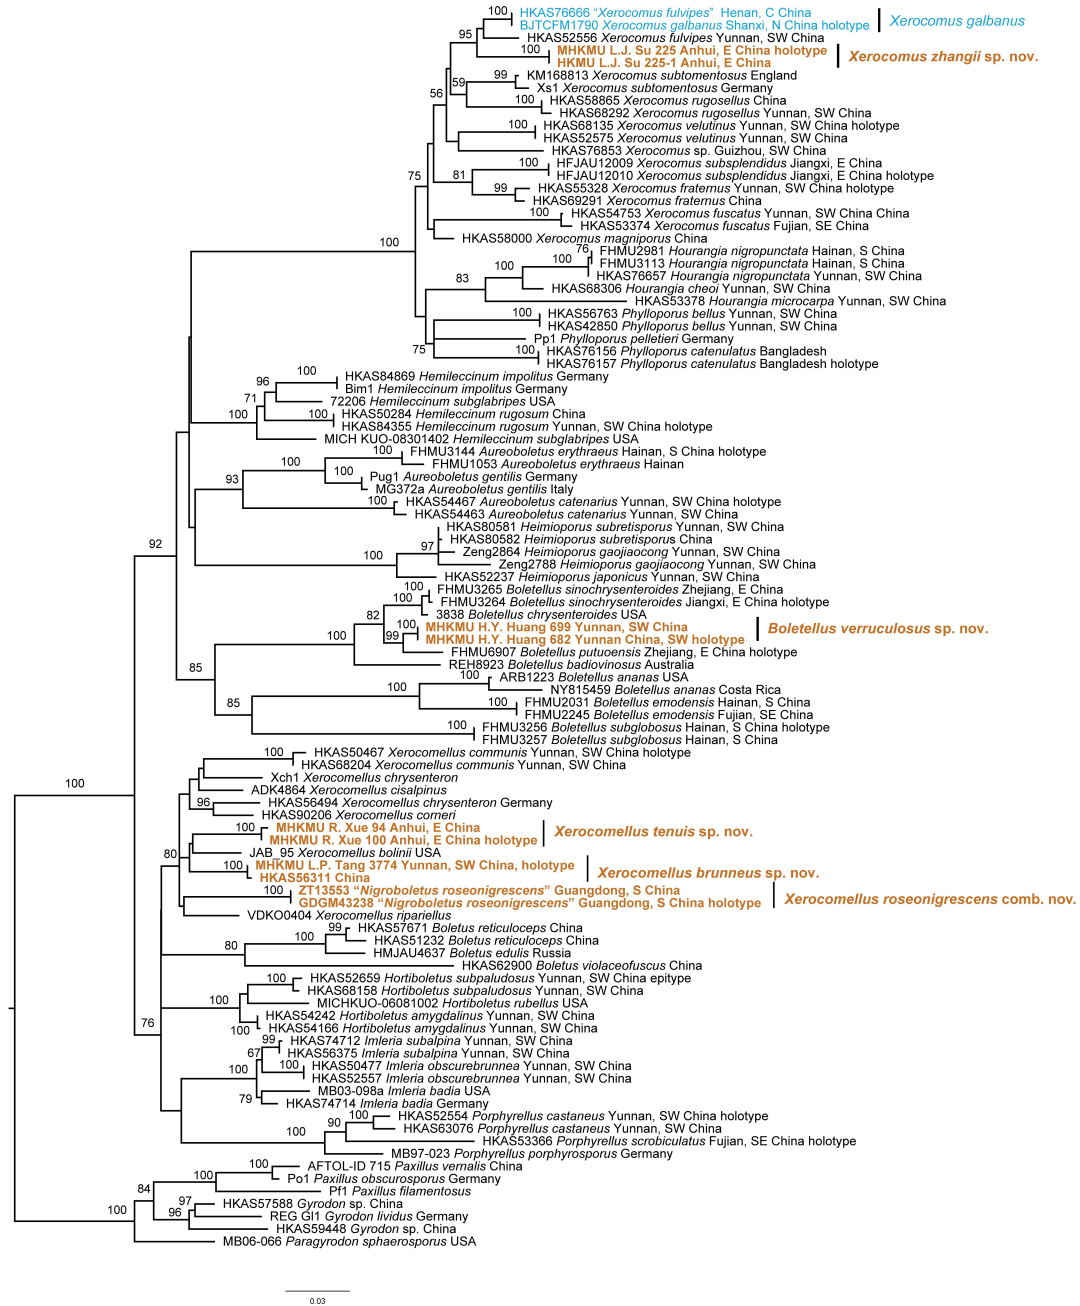

**Figure S2.** Phylogenetic tree of *Boletaceae* based on *tef1* dataset. RAXML BP values ( $\geq 50\%$ ) are shown above branches. Notes: C = Central, E = Eastern, N = Northern, S = Southern, SE = Southeastern, SW = Southwestern.

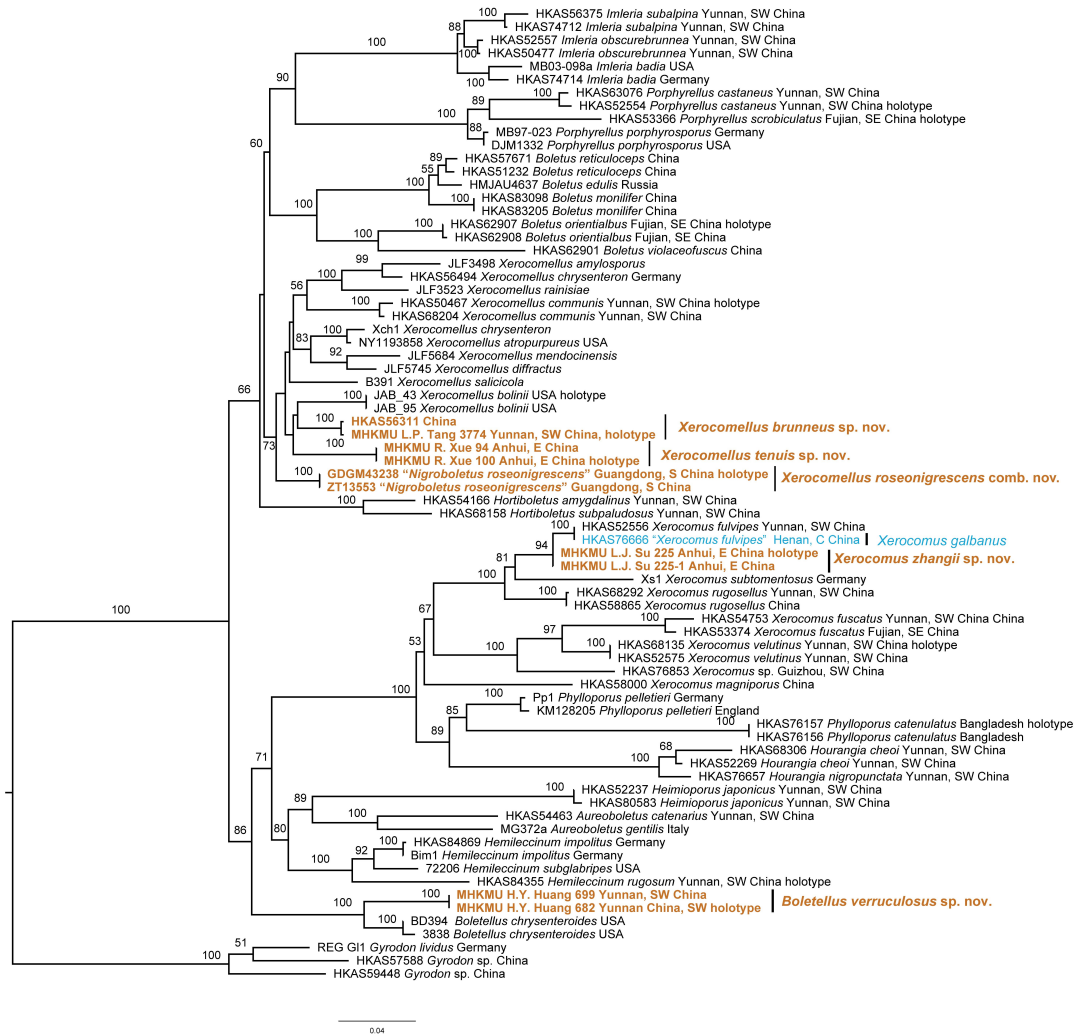

**Figure S3.** Phylogenetic tree of *Boletaceae* based on *rpb1* dataset. RAxML BP values ( $\geq 50\%$ ) are shown above branches. Notes: C = Central, E = Eastern, N = Northern, S = Southern, SE = Southeastern, SW = Southwestern.

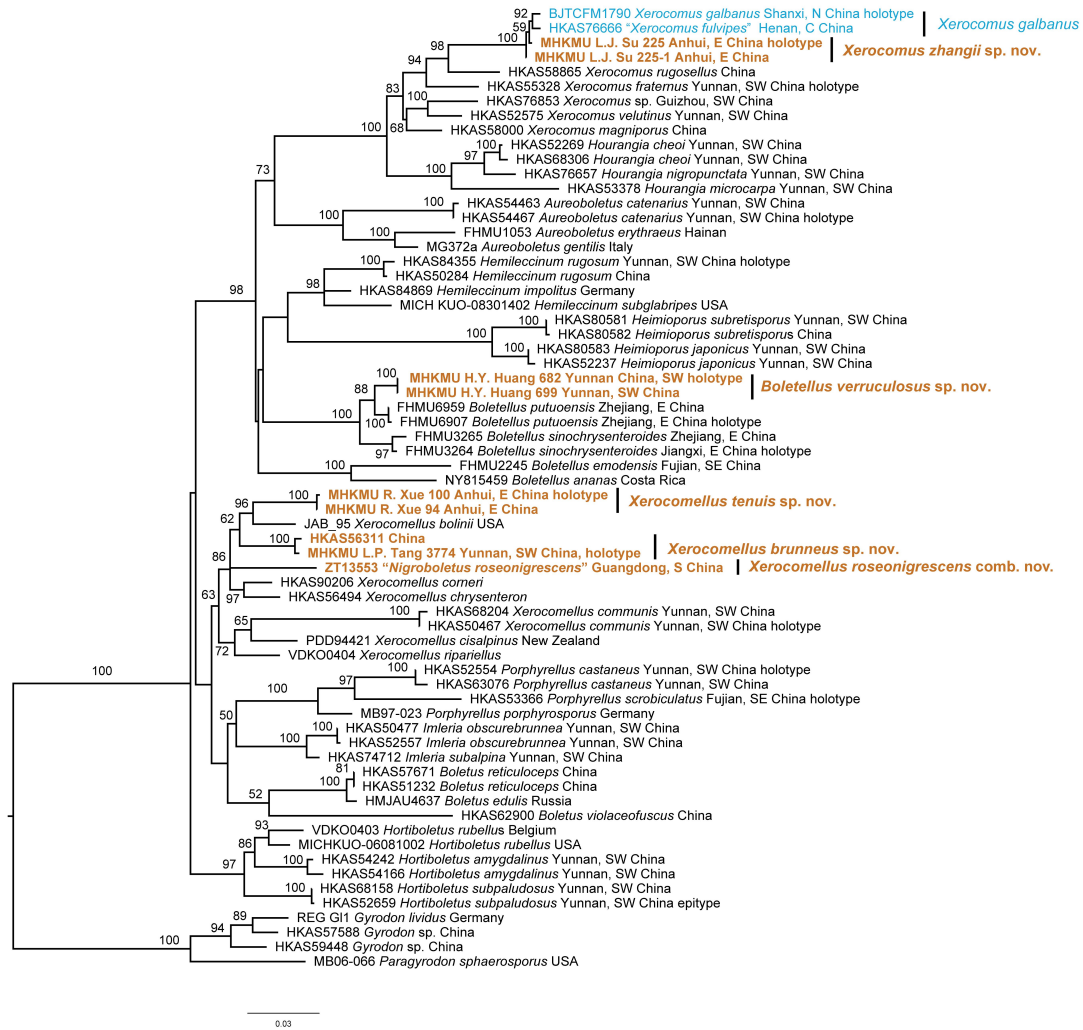

**Figure S4.** Phylogenetic tree of *Boletaceae* based on *rpb2* dataset. RAxML BP values ( $\geq 50\%$ ) are shown above branches. Notes: C = Central, E = Eastern, N = Northern, S = Southern, SE = Southeastern, SW = Southwestern.
